# Supplementary material for: Bidimensional ZSM-5 zeolites probed as catalysts for polyethylene cracking
Source: Royal Society of Chemistry journal article supplement (doi:10.1039/c5cy02075a), 2016-01-01

# Supplementary Information

## Bidimensional ZSM-5 Zeolites Probed as Catalysts for Polyethylene Cracking

A. Peral,<sup>a</sup> J. M. Escola,<sup>a\*</sup> D. P. Serrano,<sup>ab</sup> J. Přech,<sup>c</sup> C. Ochoa-Hernández,<sup>c</sup> J. Čejka<sup>c\*</sup>

<sup>a</sup>Environmental and Chemical Engineering Group, ESCET, Rey Juan Carlos University, c/  
Tulipán s/n, 28933, Móstoles, Spain

<sup>b</sup>IMDEA Energy Institute, Avda Ramón de la Sagra, nº 3, 28935, Móstoles, Spain

<sup>c</sup>Heyrovský Institute of Physical Chemistry, Academy of Sciences of the Czech Republic, v.v.i.,  
Dolejškova 3, 182 23, Prague 8, Czech Republic

Figure S1. FTIR spectra of the calcined 2D ZSM-5 samples.

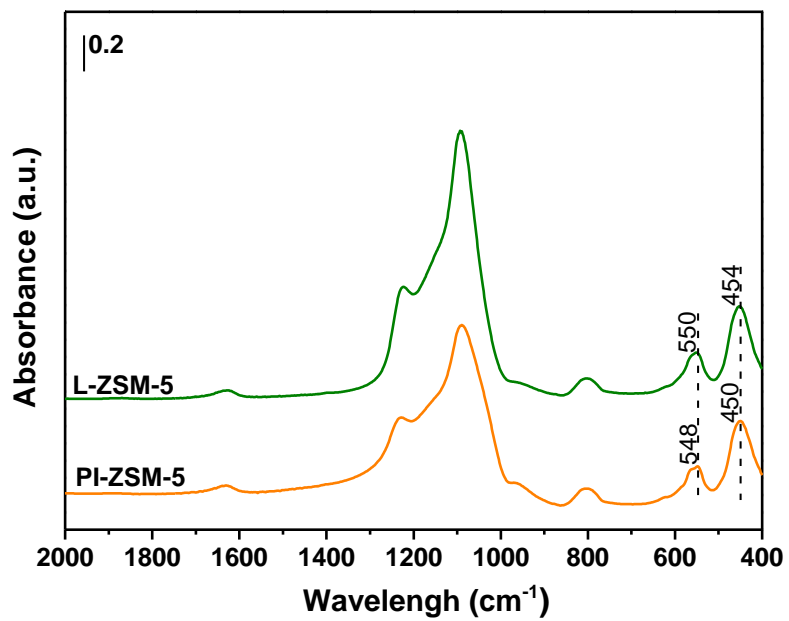

**Figure S2.** Ammonia TPD curves of the calcined 2D ZSM-5 samples.

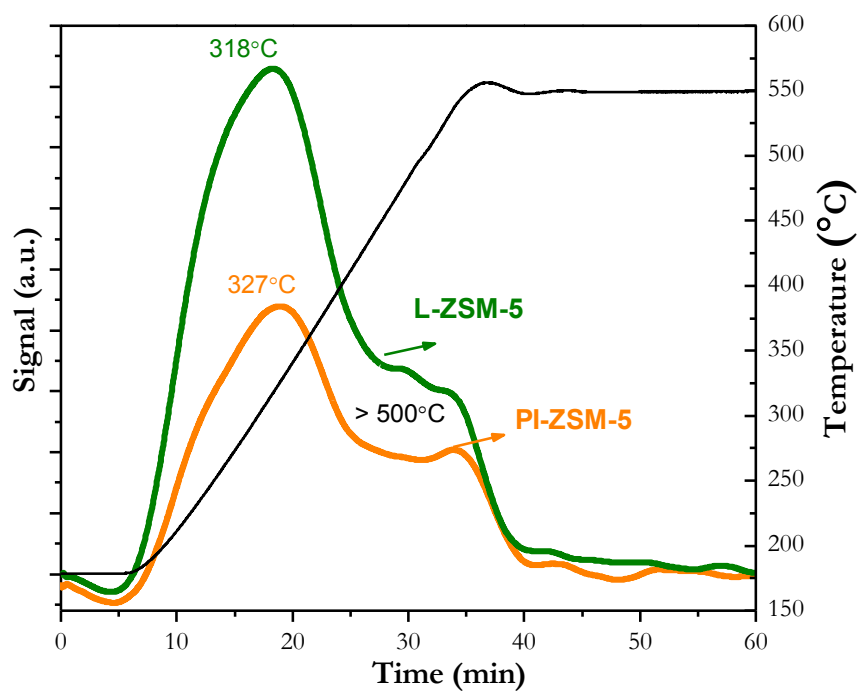

Figure S3. Ar adsorption and desorption isotherms at -186 °C of the reference ZSM-5 samples.

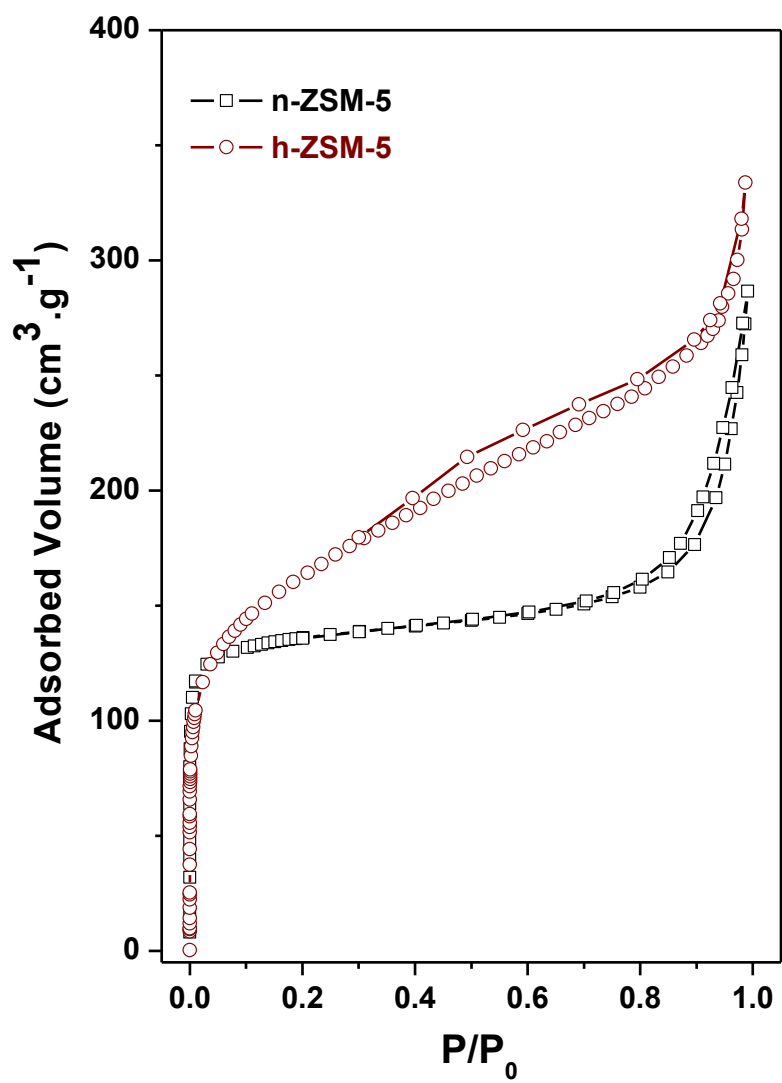

**Figure S4.** Wide-angle XRD of the reference ZSM-5 samples.

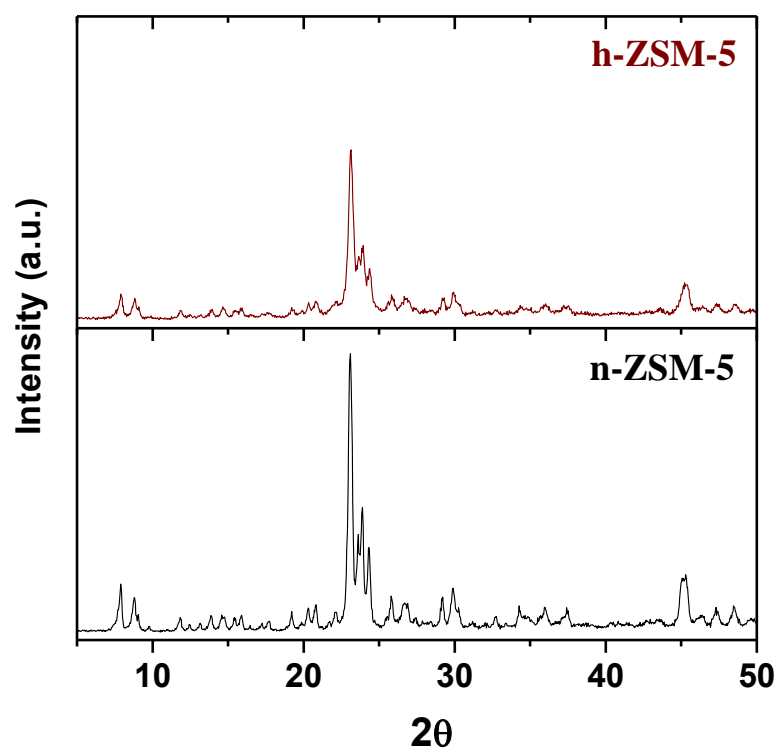

Supplement: c5cy02075a1.pdf [file c5cy02075a1.pdf]
